# Supplementary material
Source: PubMed Central journal article supplement (PMC9440926)
Supplement: 41467_2022_32854_MOESM1_ESM.pdf [file 41467_2022_32854_MOESM1_ESM.pdf]

## Supplementary Information

### **X-ray crystallographic characterization of the SARS-CoV-2 main protease polyprotein cleavage sites essential for viral processing and maturation**

Jaeyong Lee<sup>1,2\*</sup>, Calem Kenward<sup>1\*</sup>, Liam J. Worrall<sup>1\*</sup>, Marija Vuckovic<sup>1</sup>, Francesco Gentile<sup>3</sup>, Anh-Tien Ton<sup>3</sup>, Myles Ng<sup>1</sup>, Artem Cherkasov<sup>3</sup>, Natalie C.J. Strynadka<sup>1†</sup> and Mark Paetzel<sup>2†</sup>

<sup>1</sup>Department of Biochemistry and Molecular Biology and Centre for Blood Research, The University of British Columbia, Vancouver, British Columbia, Canada; <sup>2</sup>Department of Molecular Biology and Biochemistry, Simon Fraser University, Burnaby, British Columbia, Canada; <sup>3</sup>Vancouver Prostate Centre, The University of British Columbia, Vancouver, British Columbia, Canada

\*These authors contributed equally.

† Correspondence to [ncjs@mail.ubc.ca](mailto:ncjs@mail.ubc.ca) and [mpaetzel@sfu.ca](mailto:mpaetzel@sfu.ca)

#### **This file includes:**

Supplementary Figures 1-6 and Supplementary Tables 1-7

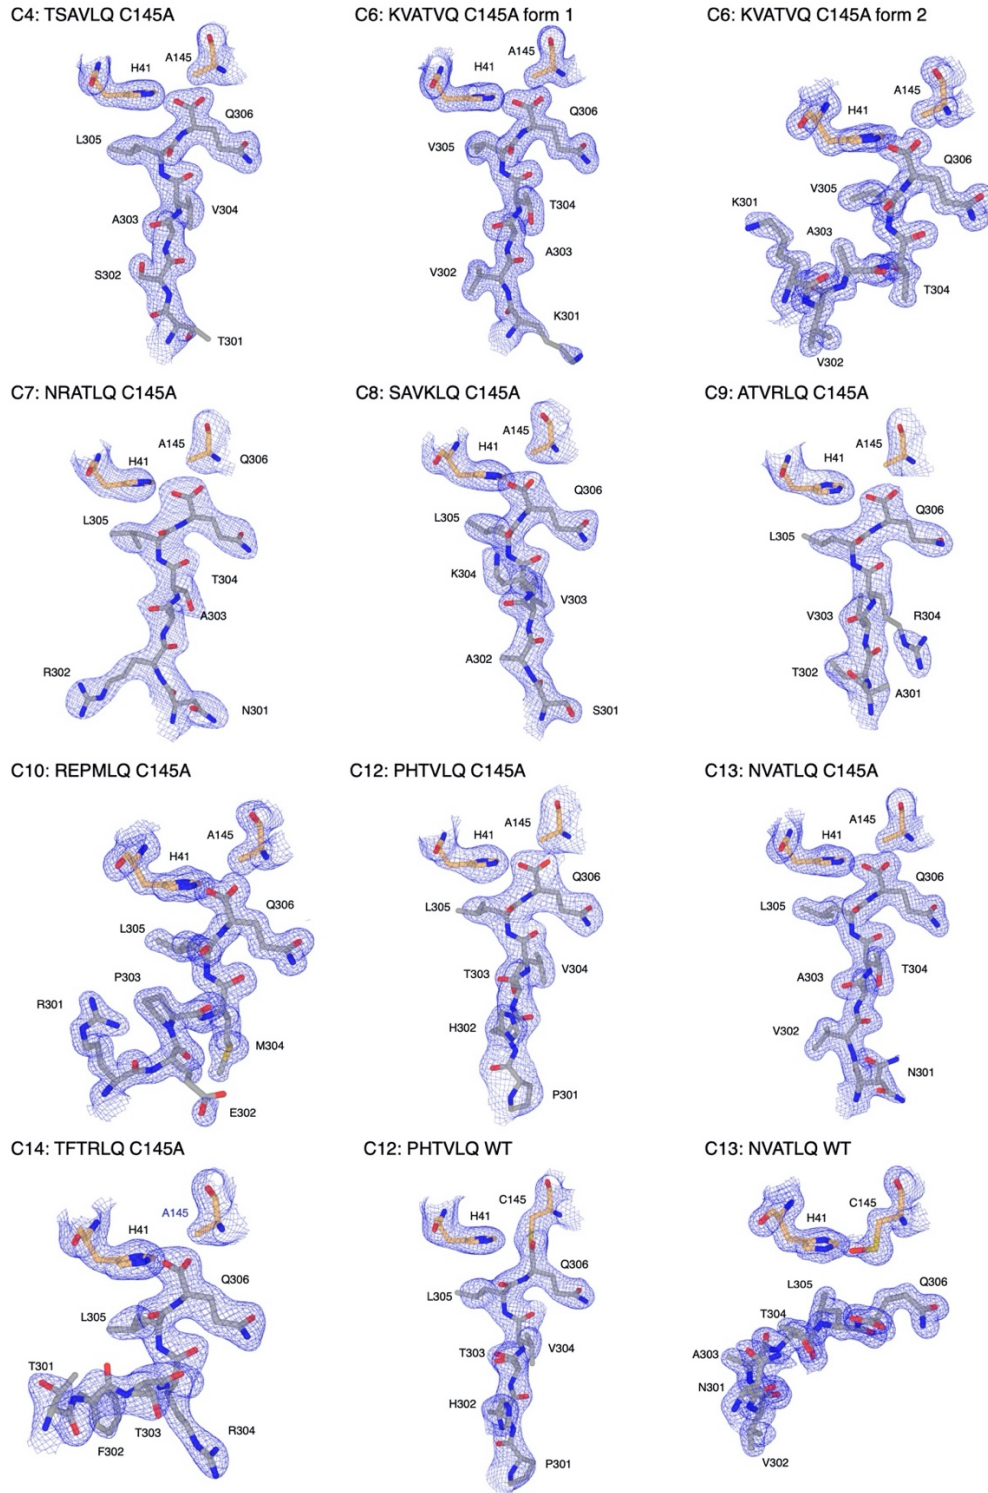

**Supplementary Fig. 1. Representative electron density maps for bound cleavage sites.** 2mFo-DFc electron density (contoured at  $1.0 \sigma$ ) of each substrate sequence (C4-C14) shows presence of the bound C-terminal product within catalytic site of wildtype (C12-WT and C13-WT) and C145A (C4-C14) M<sup>Pro</sup> mutants.

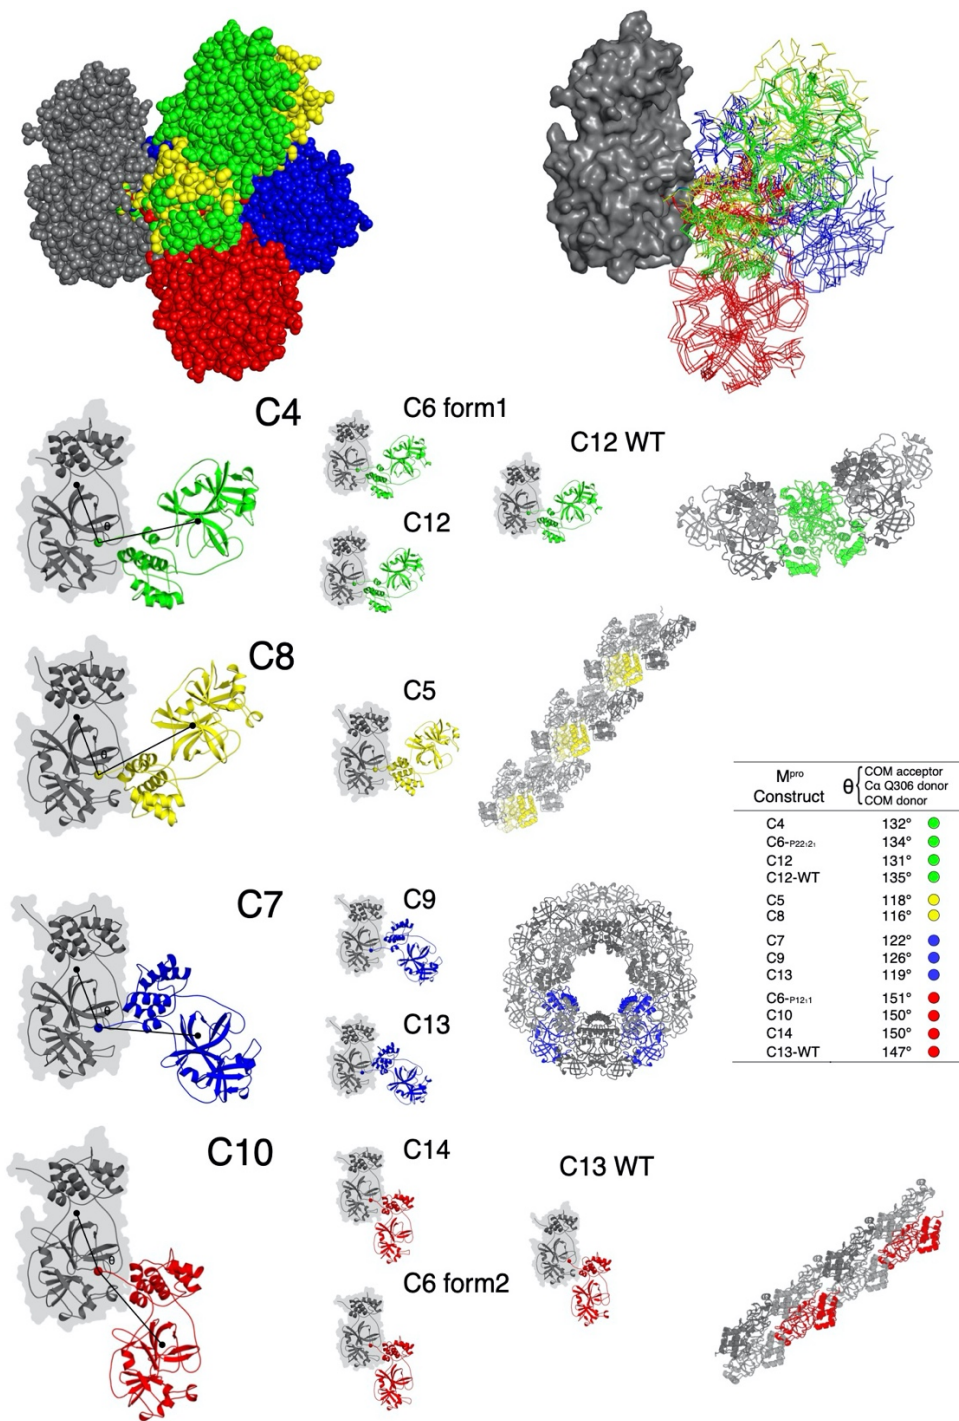

**Supplementary Fig. 2. The angles of approach that the C-terminus of donor protomers make towards the substrate specificity binding groove of its neighboring acceptor molecule.** Donor protomers are colored and neighboring acceptor molecules are grey with a common orientation. Four different general approach clusters were observed for the presentation of the specificity residues (colored green, blue, yellow, and red) to the neighboring active site (colored grey) and as superposed collectively in the space filling surface diagram, top left, with corresponding superposition of donor line drawings right. The four approach clusters are further depicted individually. The  $C\alpha$  of residue 306 in each grouping is shown as a sphere to highlight its position within the active site of the statically placed acceptor. The corresponding crystal lattice packing is also illustrated adjacent for each grouping. The calculated angle of approach is defined in the inset table (COM: Center of Mass).

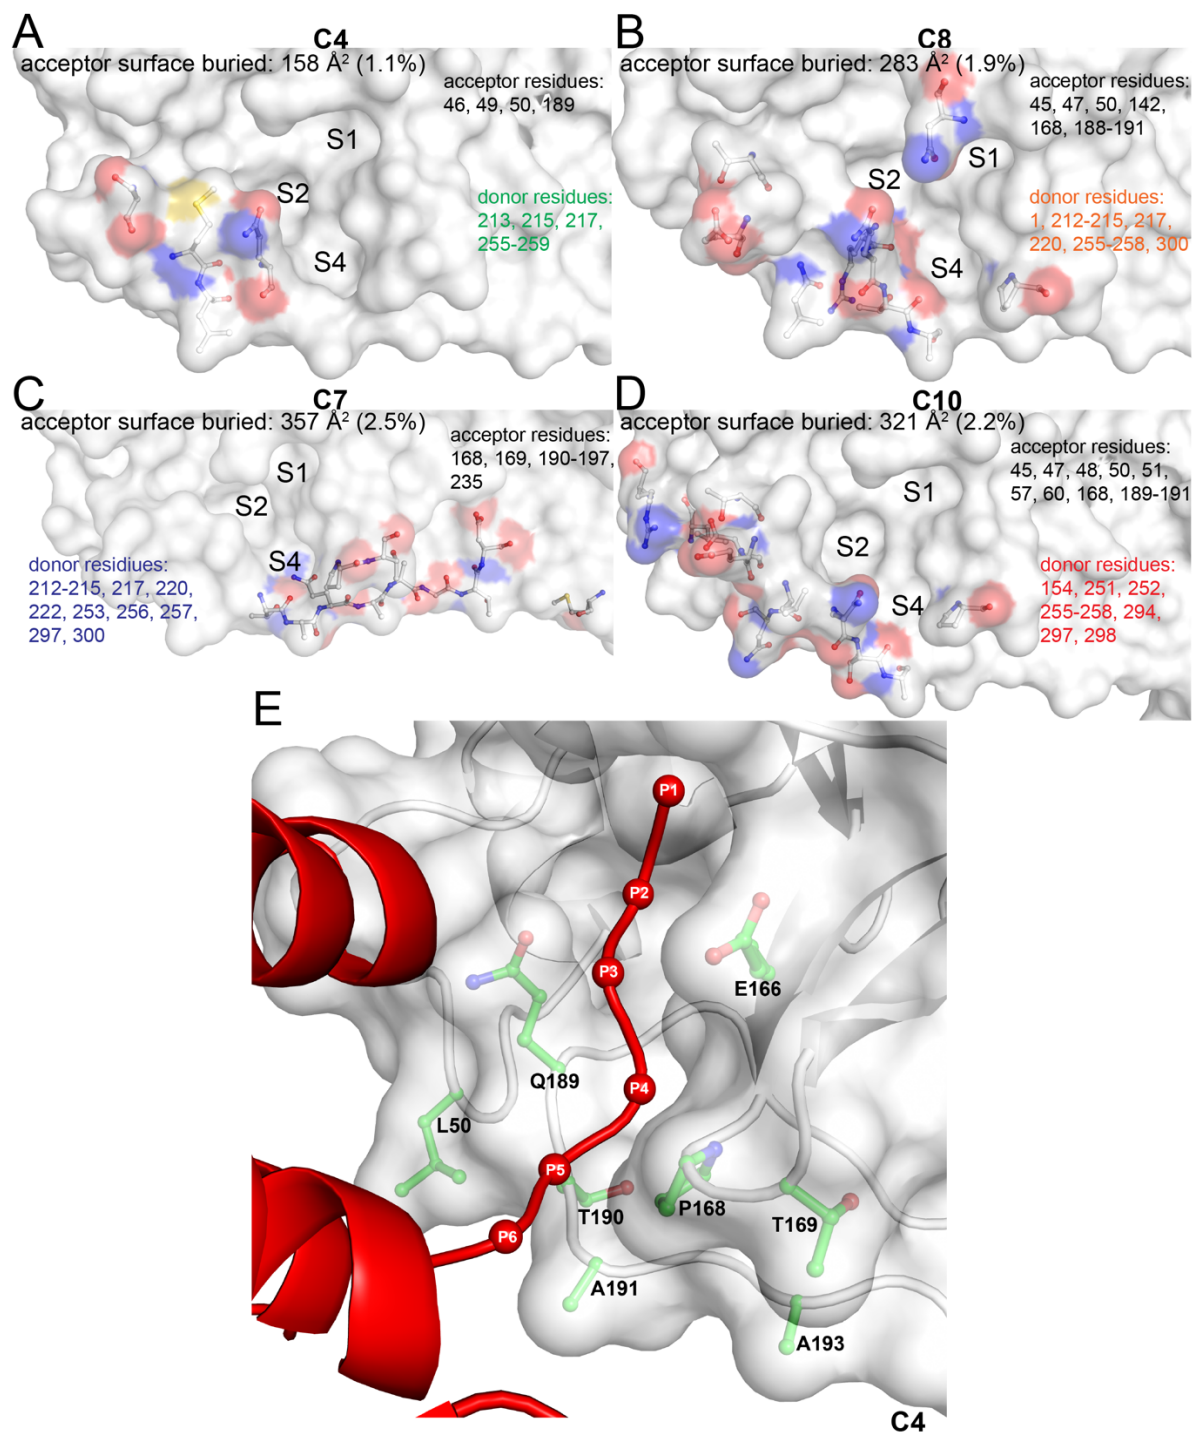

**Supplementary Fig. 3. Approach variant binding analysis.** A-D Contact surface illustration and analysis of the M<sup>Pro</sup> donor/acceptor approach variants as shown and colored in Supplementary Fig. 2 highlighting their varied positioning on either side of the acceptor binding groove cleft (labelled subsites). The acceptor and donor residues involved (P6-P1 excluded), the buried surface as well as number of productive hydrogen bonds are listed in each case. E. A zoomed in view of the conserved aliphatic ridge at the entrance of the M<sup>Pro</sup> acceptor binding groove we hypothesize may ensure an open form for facilitated binding of multiple viral and human substrates. C4 donor is shown in red ribbon with C-terminal P6-P1 C $\alpha$  atoms denoted as red spheres, localized in the acceptor active site groove (grey molecular surface superposed with grey C $\alpha$  ribbon, highlighted side chains in CPK with green carbons and labelled).

**A** c4 - 1 Ct

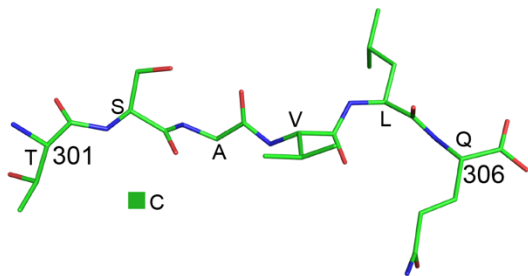

**B** c5

A,B: RMSD = 0.962 (34 to 34 atoms)

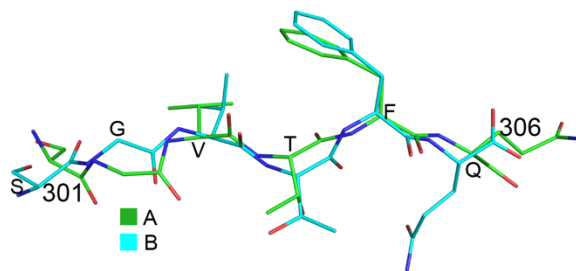

**C** c5-AE

A,B: RMSD = 1.337 (38 to 38 atoms)

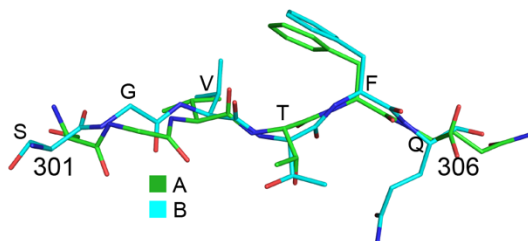

**D** c6-P22,2, - 1 Ct

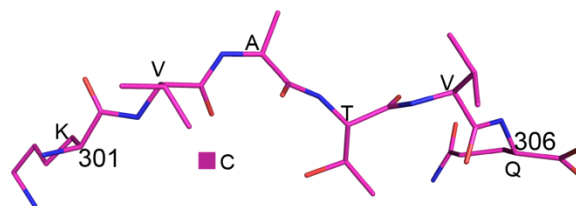

**E** c6-P2,1

A,B: RMSD = 0.079 (37 to 37 atoms)

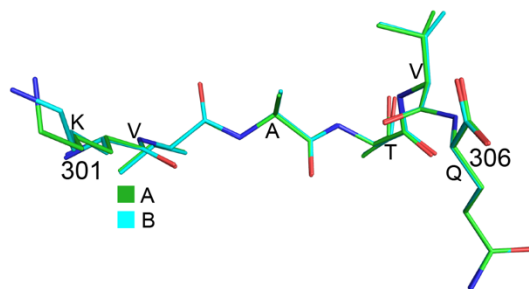

**F** c7

A,B: RMSD = 0.378 (39 to 39 atoms)

A,C: RMSD = 0.412 (45 to 45 atoms)

A,D: RMSD = 0.401 (43 to 43 atoms)

A,E: RMSD = 0.547 (40 to 40 atoms)

A,F: RMSD = 0.503 (42 to 42 atoms)

A,G: RMSD = 0.263 (39 to 39 atoms)

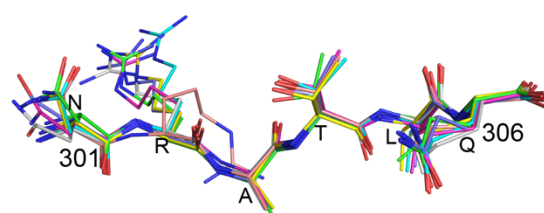

**G** c8

A,B: RMSD = 0.231 (35 to 35 atoms)

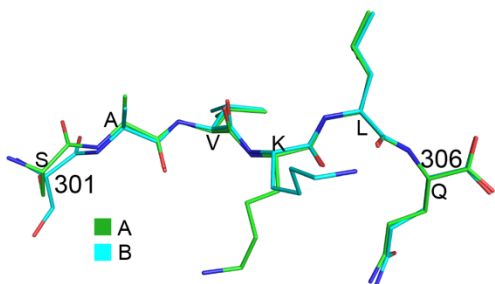

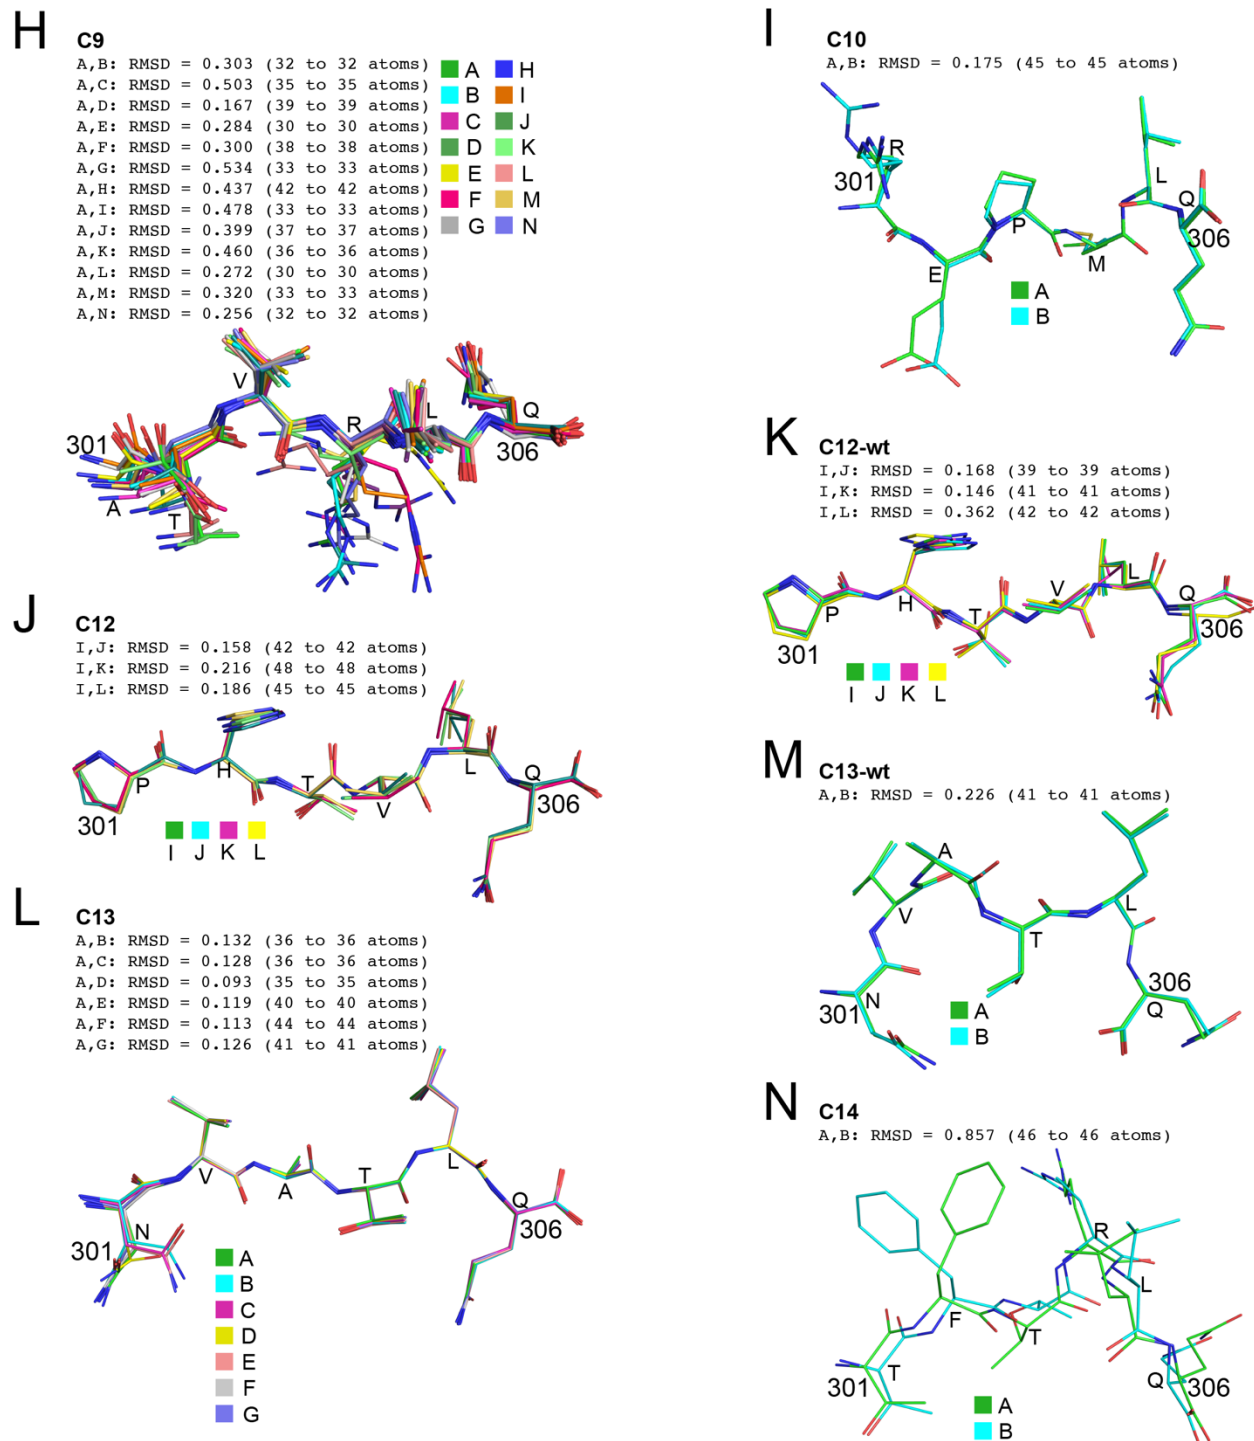

**Supplementary Fig. 4. Structural superposition of residues P6 (301) through P1 (306) for all protomers within the asymmetric unit of each cleavage site variant crystal.** Listed above the line structure of the superimposed chains are the root mean square deviation values for each chain and the number of common atoms applied to the alignment onto chain A. Each chain has a different color for the carbons which is defined by the legend below each alignment. Each residue is labeled. All resulting RMSD values are listed in Å units.

M<sup>PRO</sup> H-bond summary

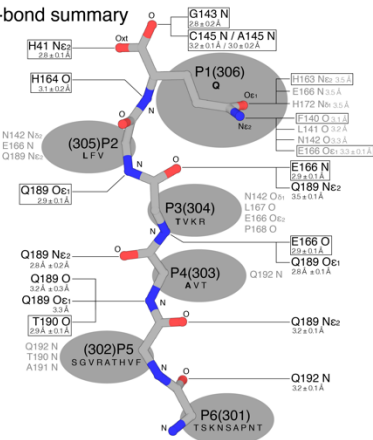

C4: TSAVLQ C145A

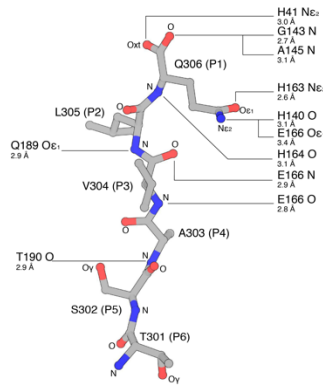

C5: SGVTFQ C145A

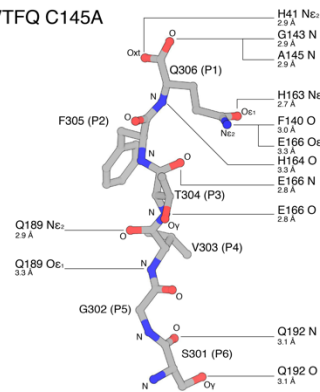

C6: KVATVQ C145A

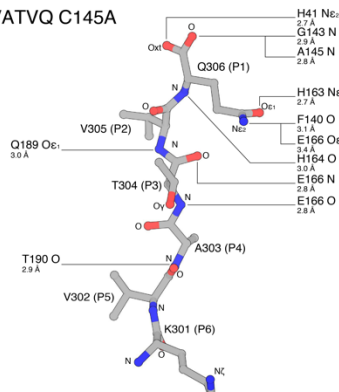

C6: KVATVQ C145A form 2

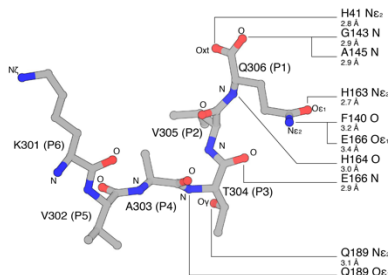

C7: NRATLQ C145A

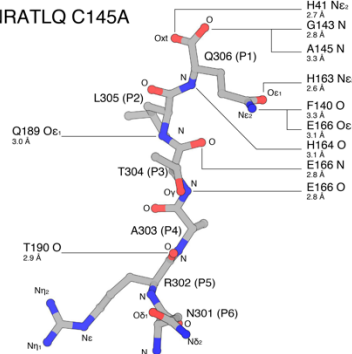

C8: SAVKLQ C145A

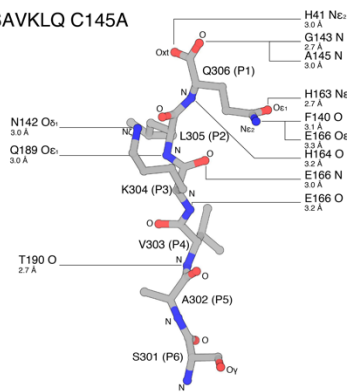

C9: ATVRLQ C145A

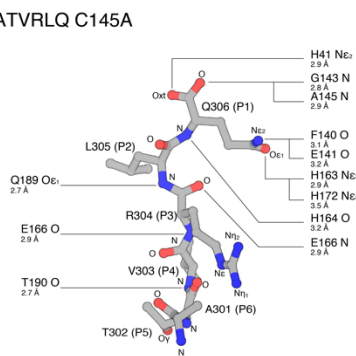

C10: REPMLQ C145A form 2

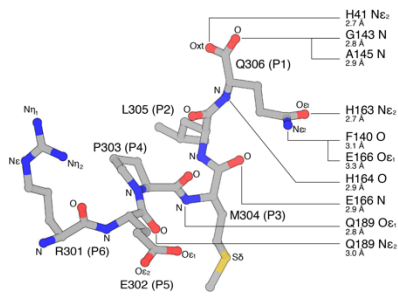

C12: PHTVLQ C145A

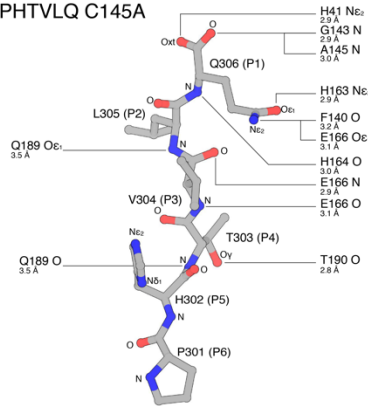

C12: PHTVLQ WT

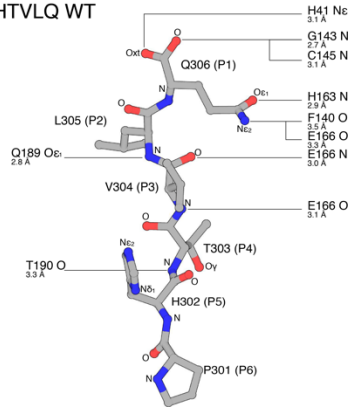

C12: PHTVLQ WT AE

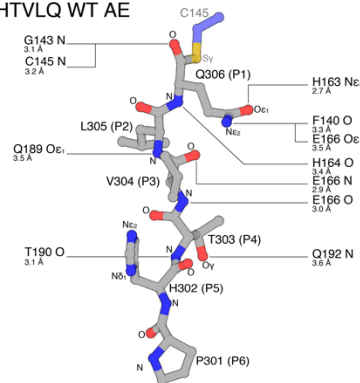

C13: NVATLQ C145A

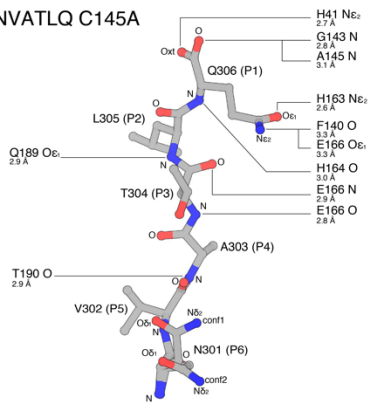

C13: NVATLQ WT form 2

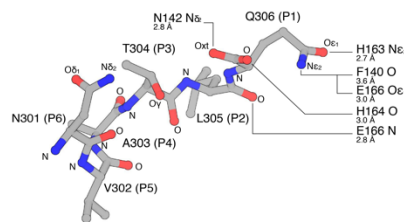

C14: TFTRLQ form 2

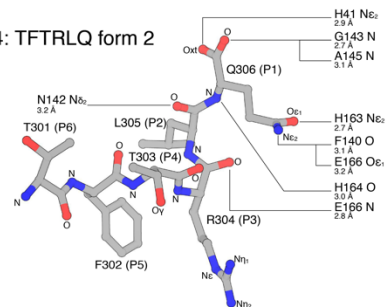



**Supplementary Fig. 5. A summary of hydrogen bonding interactions between the P6 (301) through P1 (306) residue atoms of the 10 cleavage site variants and the atoms within the substrate binding site of  $M^{pro}$ .** Standard deviations for the hydrogen bond lengths are listed for those interactions that occur more than once. Grey text signifies the atoms involving sidechain hydrogen bond interactions. Top left is a summary of all observed hydrogen bonds, side chain (light grey lines/values) or main chain (black lines/values). Black text signifies atoms involved in mainchain hydrogen bond interactions.

A

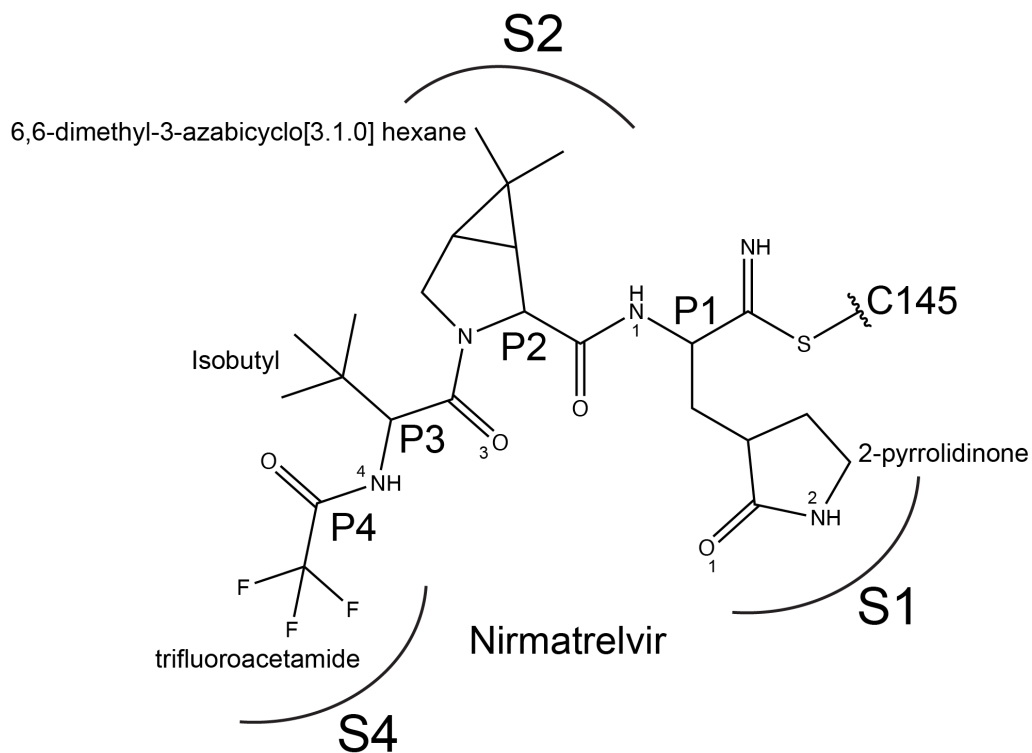

B

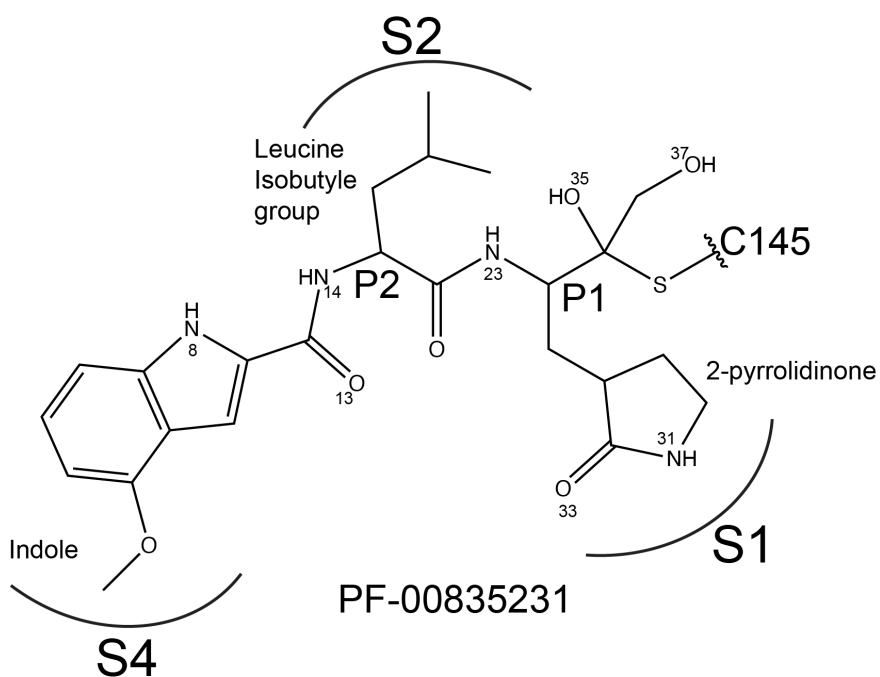

**Supplementary Fig. 6. 2D chemical drawings of drug candidates nirmatrelvir and PF-00835231. Oxygen and nitrogen atoms involved in interactions in PDB 7RFS (A) or 6XHM (B) are numbered**



**Supplementary Table 2. Crystallization Conditions**

| Construct                                  | C4<br>TSAVLQ<br>C145A           | C6<br>KVATVQ<br>C145A (form 1)  | C6<br>KVATVQ<br>C145A (form 2) | C7<br>NRATLQ<br>C145A    | C8<br>SAVKLQ<br>C145A                           | C9<br>ATVRLQ<br>C145A        | C10<br>REPMLQ<br>C145A       | C12<br>PHTVLQ<br>C145A   | C13<br>NVATLQ<br>C145A    | C14<br>TFTRLQ<br>C145A   | C12<br>PHTVLQ<br>WT          | C13<br>NVATLQ<br>WT         |
|--------------------------------------------|---------------------------------|---------------------------------|--------------------------------|--------------------------|-------------------------------------------------|------------------------------|------------------------------|--------------------------|---------------------------|--------------------------|------------------------------|-----------------------------|
| Concentration (mg/mL)                      | 9.4                             | 14.8                            | 14.8                           | 11.6                     | 9.0                                             | 25.8                         | 20.3                         | 15.9                     | 12.4                      | 16.0                     | 25.2                         | 13.5                        |
| Screen                                     | PACT-D7‡                        | PACT-C8                         | JCSG-A9                        | JCSG-C4                  | PACT-H4‡                                        | JCSG-D3                      | Class-B12                    | JCSG-A7                  | PACT-B3‡                  | PACT-B3                  | JCSG-G8                      | JCSG-F7                     |
|                                            | 0.1M Tris (pH 8.0)              | 0.1M HEPES (pH 7.0)             | 0.1M HEPES (pH 6.3)            | 0.1M HEPES (pH 7.0)      | 0.1M Tris (pH 8.5)                              | 0.1M Na/K phosphate (pH 6.2) | 0.1M tri-Na Citrate (pH 5.6) | 0.9M CHES (pH 9.5)       | 0.1M Na citrate (pH 5.6)  | 0.1M MIB buffer (pH 6.0) | 0.15M DL-Malic acid (pH 7.0) | 0.8M Succinic Acid (pH 7.0) |
| Crystal Condition                          | 20% PEG 6K<br>0.3M NaCl         | 20% PEG 6K<br>0.2M NH4Cl        | 20% PEG 3350<br>0.2M NH4Cl     | 10% PEG 6K<br>0.2M NH4Cl | 20% PEG 3350                                    | 50% PEG200<br>0.2M NaCl      | 35% t-Butanol                | 20% PEG 8K               | 16% PEG 2K                | 25% PEG 1500             | 20% PEG 3350                 |                             |
| Beamline                                   | APS 23IDD                       | ALS bl502                       | APS 23IDB                      | CLS CMCF BM              | APS 23IDB                                       | APS 23IDB                    | CLS CMCF BM                  | APS 23IDB                | ALS bl501                 | APS 23IDB                | CLS CMCF BM                  | ALS bl502                   |
| Wavelength (Å)                             | 1.033                           | 0.979                           | 1.033                          | 1.521                    | 1.033                                           | 1.033                        | 1.180                        | 1.033                    | 0.977                     | 1.033                    | 1.180                        | 0.979                       |
| Resolution                                 | 2.00 Å                          | 1.80 Å                          | 1.50 Å                         | 2.31 Å                   | 2.40 Å                                          | 2.67 Å                       | 1.50 Å                       | 2.49 Å                   | 1.98 Å                    | 2.20 Å                   | 2.26 Å                       | 1.60 Å                      |
| Space Group                                | P2 <sub>2</sub> ,2 <sub>1</sub> | P2 <sub>2</sub> ,2 <sub>1</sub> | P2 <sub>1</sub>                | C2                       | P2 <sub>1</sub> ,2 <sub>1</sub> ,2 <sub>1</sub> | C2                           | P2 <sub>1</sub>              | P2 <sub>1</sub>          | C2                        | P2 <sub>1</sub>          | P2 <sub>1</sub>              | P2 <sub>1</sub>             |
| Unit Cell Dimensions<br><i>a, b, c</i> (Å) | 67.3,<br>107.4,<br>138.1        | 67.1,<br>108.5,<br>137.8        | 47.9,<br>105.1,<br>52.3        | 166.1,<br>174.9,<br>96.3 | 85.8,<br>117.2,<br>121.4                        | 275.6,<br>217.2,<br>104.6    | 49.7,<br>107.4,<br>53.4      | 67.3,<br>107.9,<br>277.2 | 105.9,<br>216.8,<br>121.3 | 49.1,<br>105.5,<br>53.3  | 67.3,<br>107.9,<br>277.2     | 49.0,<br>107.4,<br>54.4     |
| $\alpha, \beta, \gamma$ (°)                | 90.0,<br>90.0,<br>90.0          | 90.0,<br>90.0,<br>90.0          | 90.0,<br>104.5,<br>90.0        | 90.0,<br>106.3,<br>90.0  | 90.0,<br>90.0,<br>90.0                          | 90.0,<br>111.0,<br>90.0      | 90.0,<br>103.8,<br>90.0      | 90.0,<br>90.7,<br>90.0   | 90.0,<br>94.0,<br>90.0    | 90.0,<br>104.0,<br>90.0  | 90.0,<br>90.7,<br>90.0       | 90.0,<br>103.5,<br>90.0     |
| Chains in ASU                              | 3 Chains                        | 3 chains                        | 2 chains                       | 7 chains                 | 4 chains                                        | 14 chains                    | 2 chains                     | 12 chains                | 7 chains                  | 2 chains                 | 12 chains                    | 2 chains                    |
| Solvent content                            | 49.1%                           | 49.4%                           | 33.5%                          | 55.9%                    | 44.5%                                           | 59.5%                        | 38.8%                        | 49.6%                    | 57.4%                     | 36.9%                    | 52.5%                        | 39.2%                       |
| Matthew's coefficient                      | 2.41                            | 2.43                            | 1.85                           | 2.79                     | 2.22                                            | 3.03                         | 2.01                         | 2.44                     | 2.88                      | 1.95                     | 2.59                         | 2.02                        |

‡ Crystal screen condition optimized.

**Supplementary Table 3. X-ray Crystallographic Data Statistics**

| Construct                                            | C4<br>TSAVLQ<br>C145A           | C5†<br>SGVTFQ<br>C145A        | C6<br>KVATVQ<br>C145A<br>(form 1) | C6<br>KVATVQ<br>C145A<br>(form 2) | C7‡<br>NRATLQ<br>C145A        | C8<br>SAVKLQ<br>C145A                         | C9‡<br>ATVRLQ<br>C145A        | C10<br>REPMLQ<br>C145A        | C12‡<br>PHTVLQ<br>C145A       | C13<br>NVATLQ<br>C145A        | C14<br>TFTRLQ<br>C145A        | C12‡<br>PHTVLQ<br>WT          | C13<br>NVATLQ<br>WT           |
|------------------------------------------------------|---------------------------------|-------------------------------|-----------------------------------|-----------------------------------|-------------------------------|-----------------------------------------------|-------------------------------|-------------------------------|-------------------------------|-------------------------------|-------------------------------|-------------------------------|-------------------------------|
| <b>PDB</b>                                           |                                 |                               |                                   |                                   |                               |                                               |                               |                               |                               |                               |                               |                               |                               |
| <b>Accession code</b>                                |                                 |                               |                                   |                                   |                               |                                               |                               |                               |                               |                               |                               |                               |                               |
| <b>Data collection</b>                               |                                 |                               |                                   |                                   |                               |                                               |                               |                               |                               |                               |                               |                               |                               |
| Space group                                          | P22 <sub>1</sub> 2 <sub>1</sub> | P2 <sub>1</sub>               | P22 <sub>1</sub> 2 <sub>1</sub>   | P2 <sub>1</sub>                   | C2                            | P2 <sub>1</sub> 2 <sub>1</sub> 2 <sub>1</sub> | C2                            | P2 <sub>1</sub>               | P2 <sub>1</sub>               | C2                            | P2 <sub>1</sub>               | P2 <sub>1</sub>               | P2 <sub>1</sub>               |
| Cell dimensions                                      |                                 |                               |                                   |                                   |                               |                                               |                               |                               |                               |                               |                               |                               |                               |
| <i>a</i> , <i>b</i> , <i>c</i> (Å)                   | 67.3,<br>107.4,<br>138.1        | 123.7,<br>80.3,<br>63.3       | 67.1,<br>108.5,<br>137.8          | 47.9,<br>105.1,<br>52.3           | 166.1, 174.9,<br>96.3         | 85.8,<br>117.2,<br>121.4                      | 275.6, 217.2,<br>104.6        | 49.7,<br>107.4,<br>53.4       | 67.3,<br>107.9,<br>277.2      | 105.9, 216.8,<br>121.3        | 49.1,<br>105.5,<br>53.3       | 67.3,<br>107.9,<br>277.2      | 49.0,<br>107.4,<br>54.4       |
| $\alpha$ , $\beta$ , $\gamma$ (°)                    | 90.0,<br>90.0,<br>90.0          | 90.0,<br>90.2,<br>90.0        | 90.0,<br>90.0,<br>90.0            | 90.0,<br>104.5,<br>90.0           | 90.0,<br>106.3,<br>90.0       | 90.0,<br>90.0,<br>90.0                        | 90.0,<br>111.0,<br>90.0       | 90.0,<br>103.8,<br>90.0       | 90.0,<br>90.7,<br>90.0        | 90.0,<br>94.0,<br>90.0        | 90.0,<br>104.0,<br>90.0       | 90.0,<br>90.7,<br>90.0        | 90.0,<br>103.5,<br>90.0       |
| Resolution (Å)                                       | 37.98 - 2.00<br>(2.07 - 2.00)   | 26.16 - 2.00<br>(2.07 - 2.00) | 60.32 - 1.80<br>(1.86 - 1.80)     | 45.61 - 1.50<br>(1.55 - 1.50)     | 46.22 - 2.31<br>(2.53 - 2.31) | 58.6 - 2.40<br>(2.49 - 2.40)                  | 166.0 - 2.67<br>(3.02 - 2.67) | 44.00 - 1.50<br>(1.55 - 1.50) | 60.87 - 2.49<br>(2.58 - 2.49) | 47.50 - 1.98<br>(2.05 - 1.98) | 28.30 - 2.20<br>(2.28 - 2.20) | 98.66 - 2.26<br>(2.50 - 2.26) | 43.55 - 1.60<br>(1.65 - 1.60) |
| CC1/2                                                | 1.000 (0.514)                   | 0.980<br>(0.619)              | 0.999 (0.624)                     | 0.995 (0.954)                     | 0.998 (0.566)                 | 0.998 (0.751)                                 | 0.994 (0.690)                 | 0.997 (0.628)                 | 0.997 (0.628)                 | 0.853 (0.405)                 | 0.997 (0.483)                 | 0.999 (0.591)                 | 0.999<br>(0.854)              |
| <i>R</i> <sub>sym</sub> or <i>R</i> <sub>merge</sub> | 0.024 (0.700)                   | 0.141 (0.885)                 | 0.104 (1.705)                     | 0.052 (0.251)                     | 0.073 (0.734)                 | 0.155 (1.139)                                 | 0.164 (1.027)                 | 0.134 (1.212)                 | 0.134 (1.212)                 | 0.238 (1.823)                 | 0.161 (2.005)                 | 0.115 (1.157)                 | 0.076<br>(0.777)              |
| <i>R</i> <sub>pim</sub>                              | 0.024 (0.700)                   | 0.085 (0.777)                 | 0.043 (0.735)                     | 0.026 (0.122)                     | 0.046 (0.471)                 | 0.045 (0.313)                                 | 0.068 (0.426)                 | 0.054 (0.49)                  | 0.054 (0.490)                 | 0.099 (0.805)                 | 0.065 (0.797)                 | 0.048 (0.479)                 | 0.030<br>(0.314)              |
| <i>I</i> / $\sigma$ <i>I</i>                         | 13.29 (1.10)                    | 7.71 (0.54)                   | 14.10 (1.50)                      | 21.52 (5.93)                      | 11.20 (1.70)                  | 14.29 (2.06)                                  | 8.50 (2.00)                   | 18.68 (1.66)                  | 9.10 (1.50)                   | 11.65 (0.97)                  | 9.64 (1.07)                   | 10.7 (1.60)                   | 17.12 (2.65)                  |
| Completeness (%)                                     | 99.92 (99.87)                   | 96.03 (93.88)                 | 99.95 (99.98)                     | 94.74 (82.66)                     | 93.10<br>(62.40)              | 99.83 (99.98)                                 | 92.20<br>(69.10)              | 94.96 (92.32)                 | 72.6<br>(62.00)               | 99.90 (99.81)                 | 99.82 (99.62)                 | 93.30<br>(61.90)              | 96.94<br>(95.10)              |
| Redundancy                                           | 2.0 (2.0)                       | 2.8 (1.8)                     | 12.0 (11.2)                       | 5.1 (4.9)                         | 3.4 (3.4)                     | 12.6 (13.0)                                   | 6.8 (6.8)                     | 6.9 (7.2)                     | 7.0 (7.1)                     | 6.2 (6.0)                     | 7.0 (7.2)                     | 6.4 (6.2)                     | 7.1 (7.0)                     |
| <b>Refinement</b>                                    |                                 |                               |                                   |                                   |                               |                                               |                               |                               |                               |                               |                               |                               |                               |
| Resolution                                           | 2.00 Å                          | 2.00 Å                        | 1.80 Å                            | 1.50 Å                            | 2.31 Å                        | 2.40 Å                                        | 2.67 Å                        | 1.50 Å                        | 2.49 Å                        | 1.98 Å                        | 2.20 Å                        | 2.26 Å                        | 1.60 Å                        |
| No. reflections                                      | 68332 (6750)                    | 40278 (3896)                  | 93822 (9299)                      | 75618 (6542)                      | 80942 (4047)                  | 48483 (4760)                                  | 120829<br>(15104)             | 82390 (7992)                  | 100601<br>(5918)              | 188635<br>(18774)             | 26743 (2654)                  | 115794<br>(5791)              | 69758<br>(6807)               |
| <i>R</i> <sub>work</sub> / <i>R</i> <sub>free</sub>  | 0.206 /<br>0.235                | 0.227 /<br>0.261              | 0.179 /<br>0.217                  | 0.154 /<br>0.182                  | 0.190 /<br>0.237              | 0.177 /<br>0.239                              | 0.202 /<br>0.237              | 0.162 /<br>0.191              | 0.194 /<br>0.264              | 0.176 /<br>0.223              | 0.192 /<br>0.245              | 0.197 /<br>0.248              | 0.154 /<br>0.186              |
| No. atoms                                            |                                 |                               |                                   |                                   |                               |                                               |                               |                               |                               |                               |                               |                               |                               |
| Protein                                              | 7087                            | 4997                          | 7635                              | 5381                              | 16871                         | 9660                                          | 33657                         | 5441                          | 28308                         | 18084                         | 4793                          | 28279                         | 5327                          |
| Ligand/ion                                           | 2                               | 0                             | 0                                 | 0                                 | 168                           | 10                                            | 613                           | 1                             | 14                            | 191                           | 17                            | 40                            | 67                            |
| Water                                                | 240                             | 268                           | 526                               | 603                               | 205                           | 247                                           | 210                           | 598                           | 159                           | 1394                          | 115                           | 286                           | 469                           |
| <i>B</i> -factors (Å <sup>2</sup> )                  |                                 |                               |                                   |                                   |                               |                                               |                               |                               |                               |                               |                               |                               |                               |
| Protein                                              | 67.6                            | 34.3                          | 49.6                              | 21.9                              | 64.0                          | 53.8                                          | 68.3                          | 27.7                          | 59.5                          | 45.9                          | 54.6                          | 54.0                          | 25.3                          |
| Ligand/ion                                           | 62.0                            | 0.00                          | 44.4                              | 32.3                              | 71.0                          | 55.5                                          | 72.3                          | 30.5                          | 50.8                          | 63.3                          | 61.9                          | 54.3                          | 34.1                          |
| Water                                                | 55.3                            | 36.5                          | 17.0                              | 10.0                              | 47.8                          | 48.3                                          | 55.1                          | 37.6                          | 43.7                          | 45.3                          | 44.4                          | 38.0                          | 37.6                          |
| R.M.S. deviations                                    |                                 |                               |                                   |                                   |                               |                                               |                               |                               |                               |                               |                               |                               |                               |
| Bond lengths (Å)                                     | 0.005                           | 0.011                         | 0.016                             | 0.007                             | 0.009                         | 0.008                                         | 0.003                         | 0.009                         | 0.009                         | 0.013                         | 0.008                         | 0.002                         | 0.017                         |
| Bond angles (°)                                      | 0.78                            | 1.59                          | 1.39                              | 0.95                              | 1.24                          | 0.99                                          | 0.57                          | 1.18                          | 1.10                          | 1.27                          | 1.01                          | 0.52                          | 1.55                          |
| Ramachandran                                         |                                 |                               |                                   |                                   |                               |                                               |                               |                               |                               |                               |                               |                               |                               |
| favored (%)                                          | 97.51                           | 97.04                         | 97.46                             | 98.52                             | 95.58                         | 97.77                                         | 97.29                         | 97.85                         | 94.56                         | 97.54                         | 96.22                         | 97.95                         | 97.67                         |
| allowed (%)                                          | 2.49                            | 2.63                          | 2.54                              | 1.48                              | 4.32                          | 2.23                                          | 2.64                          | 2.15                          | 5.39                          | 2.46                          | 3.45                          | 2.05                          | 2.16                          |
| outliers (%)                                         | 0.00                            | 0.33                          | 0.00                              | 0.00                              | 0.09                          | 0.00                                          | 0.07                          | 0.00                          | 0.06                          | 0.00                          | 0.33                          | 0.00                          | 0.17                          |

† Previously reported

‡ Anisotropic cut-off applied to merged intensity data. See Table 4a and 4b.

### Supplementary Table 4a.

"The anisotropic delta-B indicates the directional dependence of the intensity falloff with resolution and is defined as the difference between the two principal components with the most extreme values. An anisotropic  $\Delta B$  of 10  $\text{\AA}^2$  indicates mild anisotropy. An anisotropic  $\Delta B$  over 25  $\text{\AA}^2$  indicates strong anisotropy. An anisotropic  $\Delta B$  over 50  $\text{\AA}^2$  indicates severe anisotropy. The stronger the anisotropy, the more beneficial it is to employ the ellipsoidal truncation and anisotropic scaling."

-UCLA-Doe Institute: Diffraction anisotropy server. UCLADOE Institute from <https://srv.mbi.ucla.edu/Anisoscale/discussion>

| Structure           | Uncorrected high resolution limit cut-off ( $\text{\AA}$ ) | Mean $I / \sigma(I)$ in highest resolution shell | Completeness In highest resolution shell (%) | Estimates of resolution limits in reciprocal lattice directions, from mean $I / \sigma(I) > 1$ ( $\text{\AA}$ ) |             |             | Anisotropic $\Delta B$ ( $\text{\AA}^2$ ) | Resolution limit after STARANISO correction | Mean $I / \sigma(I)$ In highest resolution shell after correction | Completeness (ellipsoidal) in highest resolution shell (%) |
|---------------------|------------------------------------------------------------|--------------------------------------------------|----------------------------------------------|-----------------------------------------------------------------------------------------------------------------|-------------|-------------|-------------------------------------------|---------------------------------------------|-------------------------------------------------------------------|------------------------------------------------------------|
|                     |                                                            |                                                  |                                              | h                                                                                                               | k           | l           |                                           |                                             |                                                                   |                                                            |
| <b>C145A</b>        |                                                            |                                                  |                                              |                                                                                                                 |             |             |                                           |                                             |                                                                   |                                                            |
| C4 – TSAVLQ         | 2.00                                                       | 1.6                                              | 100.0                                        | 1.99                                                                                                            | 2.28        | 1.89        | 13.0                                      |                                             |                                                                   |                                                            |
| C5 – SGVTFQ*        | 2.00                                                       | 0.6                                              | 93.6                                         | 2.00                                                                                                            | 2.01        | 2.00        | 7.1                                       |                                             |                                                                   |                                                            |
| C6 – KVATVQ         |                                                            |                                                  |                                              |                                                                                                                 |             |             |                                           |                                             |                                                                   |                                                            |
| form 2              | 1.50                                                       | 5.7                                              | 74.9                                         | 1.49                                                                                                            | 1.43        | 1.40        | 1.23                                      |                                             |                                                                   |                                                            |
| form 1              | 1.80                                                       | 1.5                                              | 100.0                                        | 1.66                                                                                                            | 1.98        | 1.66        | 11.4                                      |                                             |                                                                   |                                                            |
| <b>C7 – NRATLQ</b>  | <b>2.60</b>                                                | <b>1.3</b>                                       | <b>99.5</b>                                  | <b>2.48</b>                                                                                                     | <b>2.23</b> | <b>2.87</b> | <b>19.0</b>                               | <b>2.31</b>                                 | <b>1.7</b>                                                        | <b>62.4</b>                                                |
| C8 – SAVKLQ         | 2.40                                                       | 1.0                                              | 99.6                                         | 2.14                                                                                                            | 2.25        | 2.31        | 7.80                                      |                                             |                                                                   |                                                            |
| <b>C9 – ATVRLQ</b>  | <b>2.80</b>                                                | <b>0.8</b>                                       | <b>99.8</b>                                  | <b>3.22</b>                                                                                                     | <b>2.81</b> | <b>2.67</b> | <b>39.9</b>                               | <b>2.67</b>                                 | <b>2.0</b>                                                        | <b>69.1</b>                                                |
| C10 – REPMLQ        | 1.50                                                       | 1.5                                              | 92.0                                         | 1.55                                                                                                            | 1.50        | 1.50        | 0.74                                      |                                             |                                                                   |                                                            |
| <b>C12 – PHTVLQ</b> | <b>2.60</b>                                                | <b>0.7</b>                                       | <b>99.7</b>                                  | <b>2.51</b>                                                                                                     | <b>3.08</b> | <b>2.71</b> | <b>25.4</b>                               | <b>2.49</b>                                 | <b>1.5</b>                                                        | <b>62.0</b>                                                |
| C13 – NVATLQ        | 1.90                                                       | 1.0                                              | 99.9                                         | 2.21                                                                                                            | 1.92        | 1.95        | 5.01                                      |                                             |                                                                   |                                                            |
| C14 – TFTRLQ        | 2.20                                                       | 1.4                                              | 95.3                                         | 2.15                                                                                                            | 2.21        | 2.62        | 11.07                                     |                                             |                                                                   |                                                            |
| <b>WT</b>           |                                                            |                                                  |                                              |                                                                                                                 |             |             |                                           |                                             |                                                                   |                                                            |
| <b>C12 – PHTVLQ</b> | <b>2.0</b>                                                 | <b>1.0</b>                                       | <b>99.7</b>                                  | <b>2.23</b>                                                                                                     | <b>2.96</b> | <b>2.21</b> | <b>26.0</b>                               | <b>2.26</b>                                 | <b>1.6</b>                                                        | <b>61.9</b>                                                |
| C13 – NVATLQ        | 1.60                                                       | 2.2                                              | 99.9                                         | 1.40                                                                                                            | 1.59        | 1.62        | 5.41                                      |                                             |                                                                   |                                                            |

\*PDB ID: 7JOY was corrected with anisotropy server prior to deposition.

Tickle, I.J., Flensburg, C., Keller, P., Paciorek, W., Sharff, A., Vonrhein, C., Bricogne, G. (2018). STARANISO (<http://staraniso.globalphasing.org/cgi-bin/staraniso.cgi>). Cambridge, United Kingdom: Global Phasing Ltd.

**Supplementary Table 4b.**

|                           | Diffraction limits (Å) and corresponding principal axes of the ellipsoid fitted to the diffraction cut-off surface as direction cosines in the orthogonal basis, and in terms of reciprocal unit-cell vectors: |         |        |         |                      | Eigenvalues of overall anisotropy tensor on IFIs (Å <sup>2</sup> ) and corresponding eigenvectors of the overall anisotropy tensor as direction cosines in the orthogonal basis, and in terms of reciprocal unit-cell vectors: |         |         |          |                      |
|---------------------------|----------------------------------------------------------------------------------------------------------------------------------------------------------------------------------------------------------------|---------|--------|---------|----------------------|--------------------------------------------------------------------------------------------------------------------------------------------------------------------------------------------------------------------------------|---------|---------|----------|----------------------|
| <b>C7 – NRATLQ C145A</b>  | 2.461                                                                                                                                                                                                          | 0.8468  | 0.0000 | -0.5319 | 0.890 a* - 0.456 c*  | 51.93                                                                                                                                                                                                                          | 0.8362, | 0.0000, | -0.5484) | 0.884 a* - 0.467 c*  |
|                           | 2.311                                                                                                                                                                                                          | 0.0000  | 1.0000 | 0.0000  | b*                   | 44.22                                                                                                                                                                                                                          | 0.0000, | 1.0000, | 0.0000)  | b*                   |
|                           | 2.882                                                                                                                                                                                                          | 0.5319  | 0.0000 | 0.8468  | 0.810 a* + 0.586 c*  | 79.33                                                                                                                                                                                                                          | 0.5484, | 0.0000, | 0.8362)  | 0.825 a* + 0.565 c*  |
| <b>C9 – ATVRLQ C145A</b>  | 2.674                                                                                                                                                                                                          | 0.9945  | 0.0000 | 0.1045  | 0.995 a* - 0.098 c*  | 62.97                                                                                                                                                                                                                          | 0.9928  | 0.0000  | 0.1201   | 0.996 a* - 0.093 c*  |
|                           | 2.718                                                                                                                                                                                                          | 0.0000  | 1.0000 | 0.0000  | b*                   | 66.10                                                                                                                                                                                                                          | 0.0000  | 1.0000  | 0.0000   | b*                   |
|                           | 3.268                                                                                                                                                                                                          | -0.1045 | 0.0000 | 0.9945  | -0.274 a* + 0.962 c* | 113.43                                                                                                                                                                                                                         | -0.1201 | 0.0000  | 0.9928   | -0.310 a* + 0.951 c* |
| <b>C12 – PHTVLQ C145A</b> | 2.490                                                                                                                                                                                                          | 0.7106  | 0.0000 | 0.7035  | 0.241 a* + 0.970 c*  | 53.58                                                                                                                                                                                                                          | 0.7131  | 0.0000  | 0.7010   | 0.243 a* + 0.970 c*  |
|                           | 3.039                                                                                                                                                                                                          | 0.0000  | 1.0000 | 0.0000  | b*                   | 88.68                                                                                                                                                                                                                          | 0.0000  | 1.0000  | 0.0000   | b*                   |
|                           | 2.664                                                                                                                                                                                                          | -0.7035 | 0.0000 | 0.7106  | -0.231 a* + 0.973 c* | 70.50                                                                                                                                                                                                                          | -0.7010 | 0.0000  | 0.7131   | -0.229 a* + 0.973 c* |
| <b>C12 – PHTVLQ WT</b>    | 2.490                                                                                                                                                                                                          | 0.7106  | 0.0000 | 0.7035  | 0.241 a* + 0.970 c*  | 53.58                                                                                                                                                                                                                          | 0.7131  | 0.0000  | 0.7010   | 0.243 a* + 0.970 c*  |
|                           | 3.039                                                                                                                                                                                                          | 0.0000  | 1.0000 | 0.0000  | b*                   | 88.68                                                                                                                                                                                                                          | 0.0000  | 1.0000  | 0.0000   | b*                   |
|                           | 2.664                                                                                                                                                                                                          | -0.7035 | 0.0000 | 0.7106  | -0.231 a* + 0.973 c* | 70.50                                                                                                                                                                                                                          | -0.7010 | 0.0000  | 0.7131   | -0.229 a* + 0.973 c* |

**Supplementary Table 5. Chain Interactions**

| Construct                               | C4<br>TSAVLQ<br>C145A                                                | C6<br>KVATVQ<br>C145A (form 1)                                       | C6<br>KVATVQ<br>C145A (form 2)                                       | C7<br>NRATLQ<br>C145A                                                                                                                                                                                  | C8<br>SAVKLQ<br>C145A                                                                                    | C9<br>ATVRLQ<br>C145A                                                                                                                                                                                                                                                                                                                                                    | C10<br>REPMLQ<br>C145A                                               | C12<br>PHTVLQ<br>C145A                                                                                                                                                                                                                                                                       | C13<br>NVATLQ<br>C145A                                                                                                                                                                                 | C14<br>TFTRLQ<br>C145A                                               | C12<br>PHTVLQ<br>WT                                                                                                                                                                                                                                                                          | C13<br>NVATLQ<br>WT                                                  |
|-----------------------------------------|----------------------------------------------------------------------|----------------------------------------------------------------------|----------------------------------------------------------------------|--------------------------------------------------------------------------------------------------------------------------------------------------------------------------------------------------------|----------------------------------------------------------------------------------------------------------|--------------------------------------------------------------------------------------------------------------------------------------------------------------------------------------------------------------------------------------------------------------------------------------------------------------------------------------------------------------------------|----------------------------------------------------------------------|----------------------------------------------------------------------------------------------------------------------------------------------------------------------------------------------------------------------------------------------------------------------------------------------|--------------------------------------------------------------------------------------------------------------------------------------------------------------------------------------------------------|----------------------------------------------------------------------|----------------------------------------------------------------------------------------------------------------------------------------------------------------------------------------------------------------------------------------------------------------------------------------------|----------------------------------------------------------------------|
| Resolution                              | 2.00 Å                                                               | 1.80 Å                                                               | 1.50 Å                                                               | 2.31 Å                                                                                                                                                                                                 | 2.40 Å                                                                                                   | 2.67 Å                                                                                                                                                                                                                                                                                                                                                                   | 1.50 Å                                                               | 2.49 Å                                                                                                                                                                                                                                                                                       | 1.98 Å                                                                                                                                                                                                 | 2.20 Å                                                               | 2.26Å                                                                                                                                                                                                                                                                                        | 1.60 Å                                                               |
| Space Group                             | P22121                                                               | P22121                                                               | P21                                                                  | C2                                                                                                                                                                                                     | P212121                                                                                                  | C2                                                                                                                                                                                                                                                                                                                                                                       | P21                                                                  | P21                                                                                                                                                                                                                                                                                          | C2                                                                                                                                                                                                     | P21                                                                  | P21                                                                                                                                                                                                                                                                                          | P21                                                                  |
| Chains in ASU                           | 3 Chains                                                             | 3 chains                                                             | 2 chains                                                             | 7 chains                                                                                                                                                                                               | 4 chains                                                                                                 | 14 chains                                                                                                                                                                                                                                                                                                                                                                | 2 chains                                                             | 12 chains                                                                                                                                                                                                                                                                                    | 7 chains                                                                                                                                                                                               | 2 chains                                                             | 12 chains                                                                                                                                                                                                                                                                                    | 3 chains                                                             |
| Representative Chains used for analysis | Chain C in active site of Chain B                                    | Chain C in active site of Chain B                                    | Chain A in active site of Chain A                                    | Chain B in active site of Chain D                                                                                                                                                                      | Chain B in active site of Chain A                                                                        | Chain B in active site of Chain F                                                                                                                                                                                                                                                                                                                                        | Chain A in active site of Chain A                                    | Chain J in active site of Chain K                                                                                                                                                                                                                                                            | Chain B in active site of Chain F                                                                                                                                                                      | Chain A in active site of Chain A                                    | (Acyl)<br>C in active site of B<br>(Product)<br>D in active site of E                                                                                                                                                                                                                        | Chain A in active site of Chain A                                    |
| Chain Interactions                      | A: truncated to 302<br>B: truncated to 302<br>C: in active site of B | A: truncated to 302<br>B: truncated to 302<br>C: in active site of B | A: in active site of symm. Op. A<br>B: in active site of symm. Op. B | A: in active site of symm. Op. G<br>B: in active site of D<br>C: in active site of B<br>D: in active site of A<br>E: in active site of F<br>F: in active site of symm. Op. C<br>G: in active site of E | A: in active site of symm. Op. B<br>B: in active site of A<br>C: truncated to 302<br>D: truncated to 303 | A: in active site of G<br>B: in active site of F<br>C: in active site of M<br>D: in active site of E<br>E: in active site of A<br>F: in active site of C<br>G: in active site of K<br>H: in active site of B<br>I: in active site of N<br>J: in active site of L<br>K: in active site of I<br>L: in active site of H<br>M: in active site of J<br>N: in active site of D | A: in active site of symm. Op. A<br>B: in active site of symm. Op. B | A: truncated to 303<br>B: truncated to 303<br>C: in active site of B<br>D: in active site of E<br>E: truncated to 303<br>F: truncated to 302<br>G: truncated to 302<br>H: truncated to 302<br>I: in active site of H<br>J: in active site of K<br>K: truncated to 303<br>L: truncated to 302 | A: in active site of symm. Op. B<br>B: in active site of F<br>C: in active site of G<br>D: in active site of E<br>E: in active site of symm. Op. C<br>F: in active site of D<br>G: in active site of A | A: in active site of symm. Op. A<br>B: in active site of symm. Op. B | A: truncated to 302<br>B: truncated to 302<br>C: in active site of B<br>D: in active site of E<br>E: truncated to 302<br>F: truncated to 302<br>G: truncated to 302<br>H: truncated to 302<br>I: in active site of H<br>J: in active site of K<br>K: truncated to 302<br>L: truncated to 302 | A: in active site of symm. Op. A<br>B: in active site of symm. Op. B |



**Supplementary Table 6: P6-P1 buried surface area**

| Construct             | Buried Surface Area by M <sup>pro</sup> Catalytic Site Position (Å <sup>2</sup> ) |    |     |     |     |     | Total |
|-----------------------|-----------------------------------------------------------------------------------|----|-----|-----|-----|-----|-------|
|                       | P6                                                                                | P5 | P4  | P3  | P2  | P1  |       |
| C4 – TSAVLQ           | 43                                                                                | 53 | 102 | 45  | 168 | 213 | 624   |
| C5 – SGVTFQ           | 53                                                                                | 30 | 66  | 30  | 128 | 146 | 452   |
| C6 – KVATVQ           | 39                                                                                | 68 | 101 | 44  | 134 | 215 | 601   |
| C6 – KVATVQ (form 2)  | 34                                                                                | 12 | 16  | 93  | 114 | 212 | 481   |
| C7 – NRATLQ           | 32                                                                                | 73 | 100 | 50  | 165 | 212 | 632   |
| C8 – SAVKLQ           | 49                                                                                | 40 | 133 | 70  | 144 | 207 | 643   |
| C9 – AVTRLQ           | 0                                                                                 | 73 | 130 | 77  | 163 | 219 | 662   |
| C10 – REPMLQ (form 2) | 71                                                                                | 14 | 54  | 165 | 159 | 218 | 681   |
| C12 – PHTVLQ          | 41                                                                                | 56 | 127 | 51  | 158 | 204 | 637   |
| C13 – NVATLQ          | 40                                                                                | 63 | 94  | 51  | 163 | 215 | 625   |
| C14 – TFTRLQ (form 2) | 15                                                                                | 68 | 25  | 109 | 122 | 209 | 548   |

**Supplementary Table 7. Summary of commonly observed P6-P1 hydrogen bond interactions**

| M <sup>pro</sup> Catalytic Site Position | Hydrogen Bond        | Occurrence | Mean Distance | Max Distance | Min Distance | Mean Bond Angle |
|------------------------------------------|----------------------|------------|---------------|--------------|--------------|-----------------|
| P4                                       | 303[N] - T190[O]     | 6          | 2.9 ± 0.1 Å   | 3.1 Å        | 2.7 Å        | 167° ± 6°       |
| P3                                       | 304[N] - E166[O]     | 8          | 2.9 ± 0.1 Å   | 3.2 Å        | 2.8 Å        | 162° ± 7°       |
|                                          | 304[O] - E166[N]     | 11         | 2.9 ± 0.1 Å   | 3.0 Å        | 2.8 Å        | 161° ± 3°       |
| P2                                       | 305[N] - Q189[OE1]   | 7          | 2.9 ± 0.1 Å   | 3.0 Å        | 2.7 Å        | 155° ± 6°       |
| P1                                       | 306[N] - H164[O]     | 11         | 3.1 ± 0.2 Å   | 3.5 Å        | 2.9 Å        | 167° ± 7°       |
|                                          | 306[O] - A145[N]     | 10         | 3.0 ± 0.1 Å   | 3.3 Å        | 2.8 Å        | 170° ± 6°       |
|                                          | 306[O] - G143[N]     | 11         | 2.8 ± 0.1 Å   | 2.9 Å        | 2.7 Å        | 139° ± 4°       |
|                                          | 306[OXT] - H41[NE2]  | 10         | 2.8 ± 0.1 Å   | 3.0 Å        | 2.7 Å        | 168° ± 7°       |
|                                          | 306[NE2] - E166[OE1] | 10         | 3.3 ± 0.1 Å   | 3.4 Å        | 3.1 Å        | 130° ± 4°       |
|                                          | 306[NE2] - F140[O]   | 11         | 3.1 ± 0.1 Å   | 3.3 Å        | 3.0 Å        | 141° ± 10°      |
|                                          | 306[OE1] - H163[NE2] | 11         | 2.7 ± 0.1 Å   | 2.9 Å        | 2.6 Å        | 166° ± 12°      |
